# Supplementary material for: Anti-inflammatory effects of indirubin derivatives on influenza A virus-infected human pulmonary microvascular endothelial cells
Source: PubMed Central journal article supplement (PMC4702174; doi:10.1038/srep18941), 2016-01-06
Supplement: srep18941-s1.pdf [file srep18941-s1.pdf]

**Anti-inflammatory effects of indirubin derivatives on influenza A virus-infected human pulmonary microvascular endothelial cells**

Hoi-Hin Kwok<sup>1,2,#</sup>, Po-Ying Poon<sup>1,2,#</sup>, Siu-Ping Fok<sup>1,2</sup>, Patrick Ying-Kit Yue<sup>1,2</sup>, Nai-Ki Mak<sup>2</sup>, Michael Chi-Wai Chan<sup>3</sup>, Joseph Sriyal Malik Peiris<sup>3</sup>, Ricky Ngok-Shun Wong<sup>1,2,\*</sup>

Supplementary figure 1A

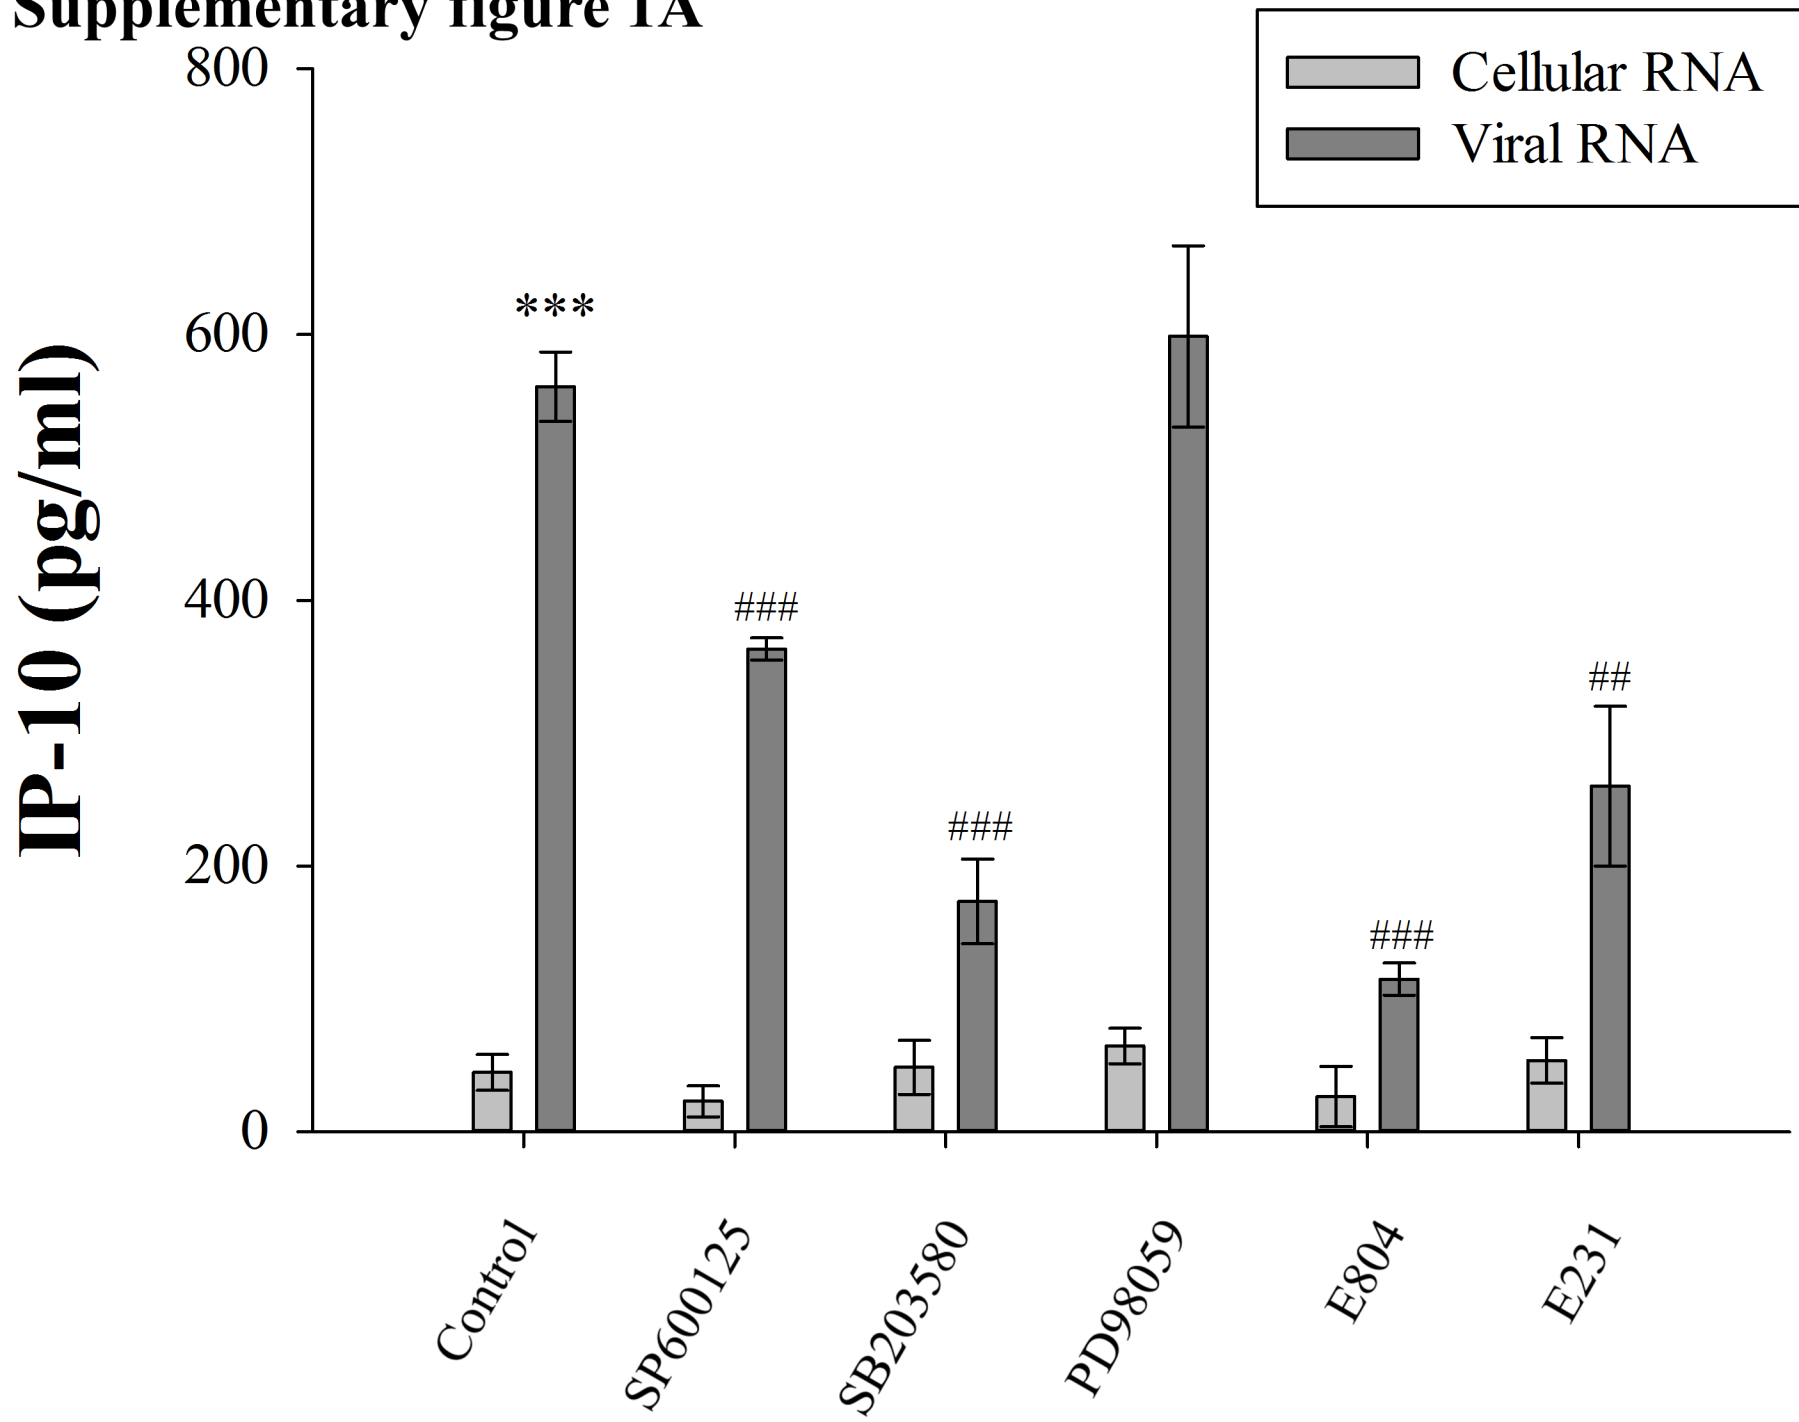

**Supplementary figure 1B**

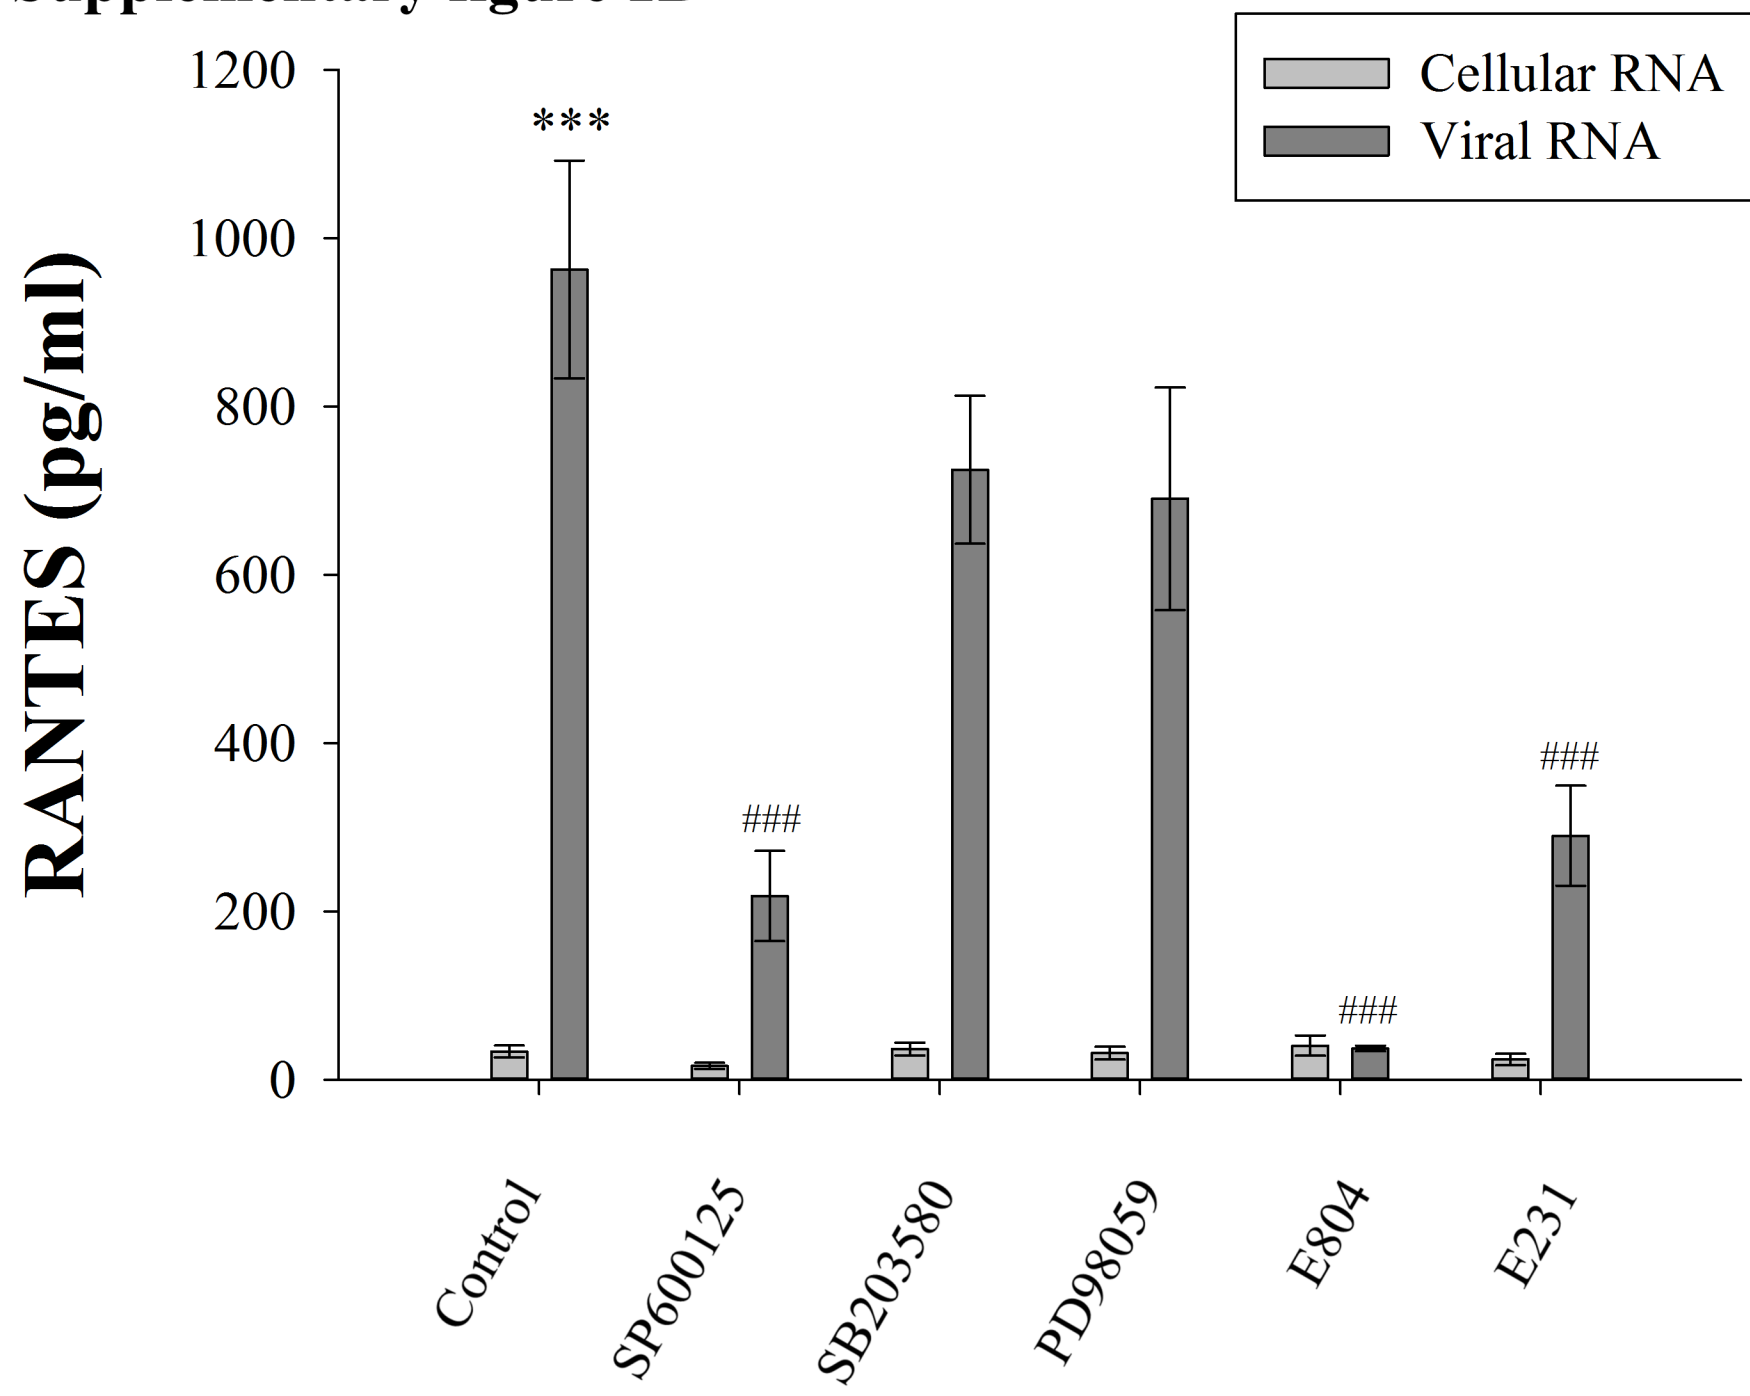

**Supplementary figure 1C**

**IL-6 (pg/ml)**

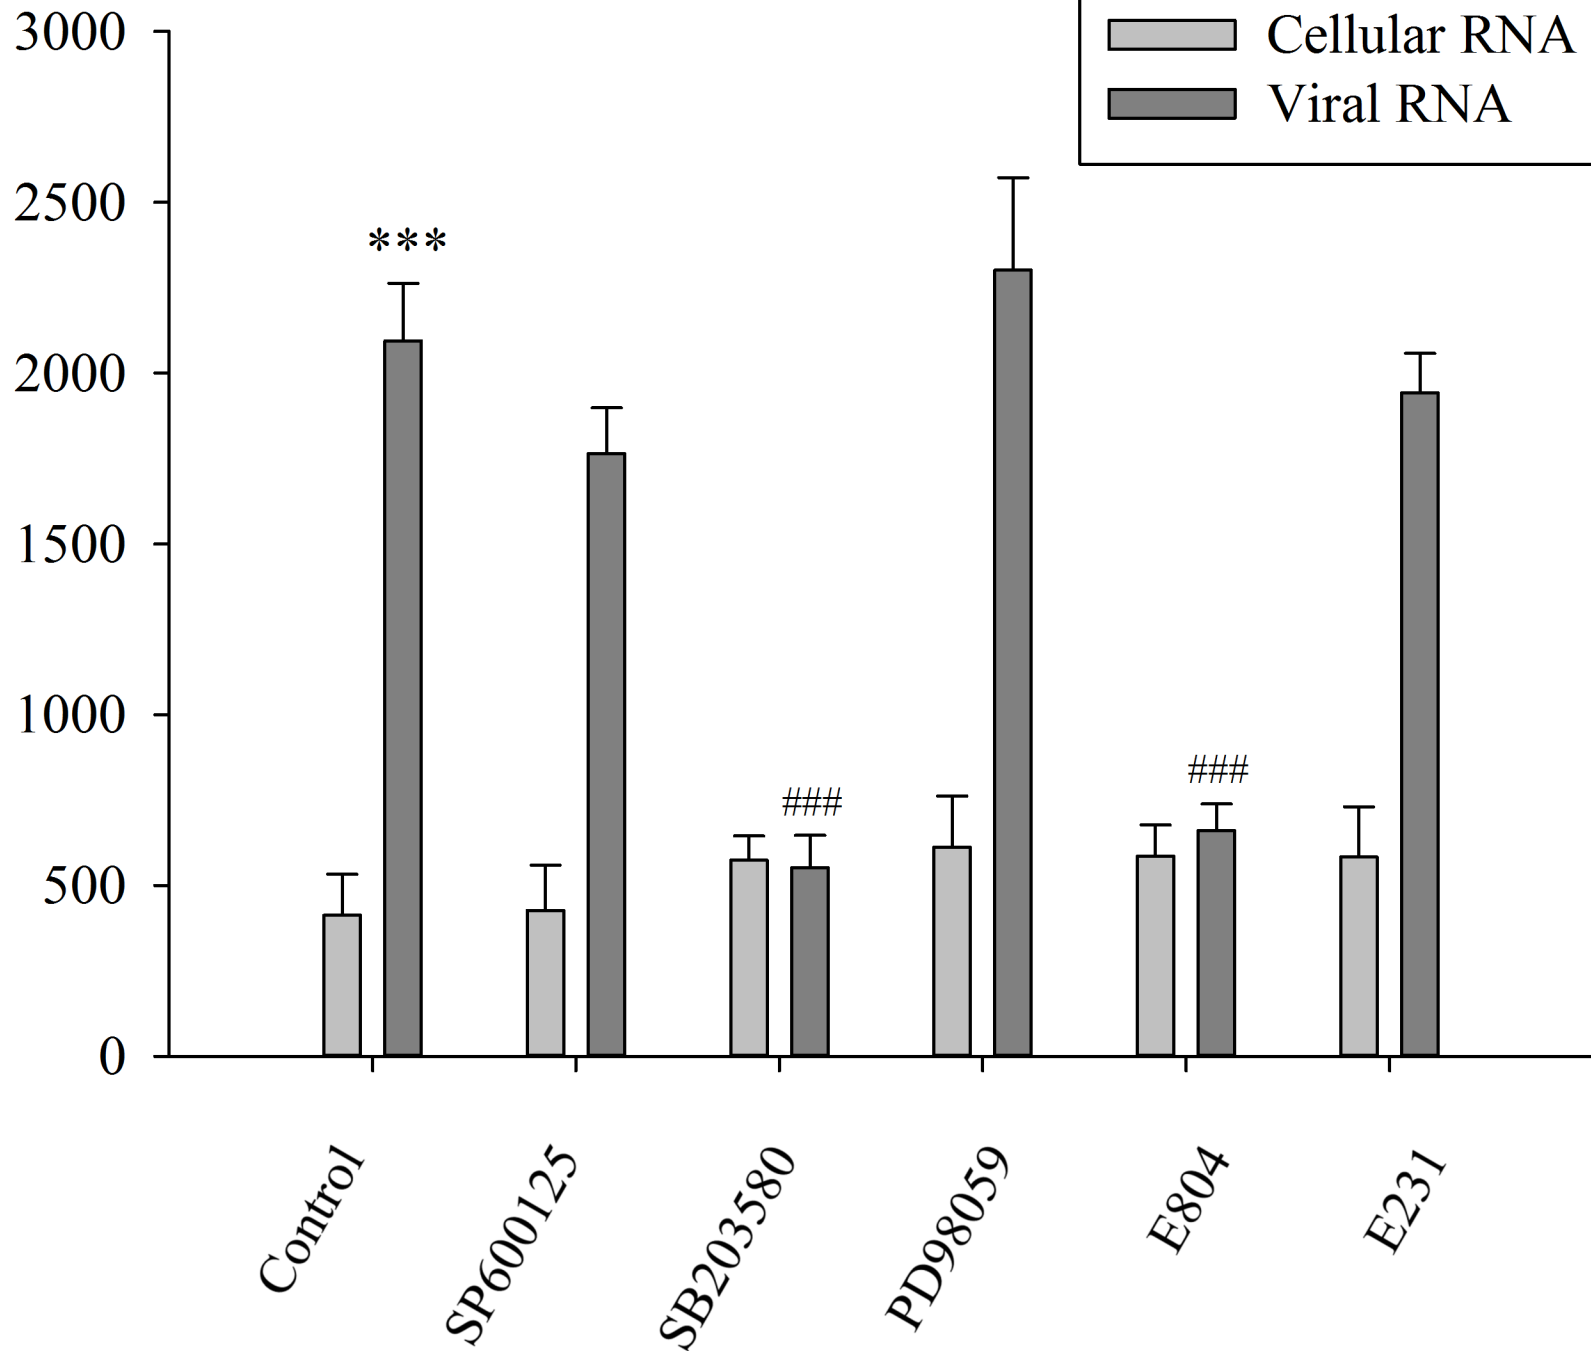

**Supplementary figure 1.** Indirubin derivatives and MAPKs inhibitors inhibited cytokines expressions are independent on viral load. HPMECs transfected with cellular RNA (100 ng/96-well) or viral RNA extracted from H9N2 (100 ng/96-well) were treated with either SP600125 (JNK inhibitors) (10  $\mu$ M), SB203580 (p38 inhibitor) (10  $\mu$ M), PD98059 (ERK inhibitor) (10  $\mu$ M), indirubin derivatives E804 (1  $\mu$ M) or E231 (1  $\mu$ M) for 24 h.p.i.. Cell culture supernatant was harvested and the levels of (A) IP-10, (B) RANTES and (C) IL-6 were measured by ELISA. The values are presented as mean  $\pm$  S.D. from three independent experiments. \*\*\*  $p < 0.001$  vs mock-infected cells. ##  $p < 0.01$ , ###  $p < 0.001$  vs cells only transfected with viral RNA.
